# Supplementary material
Source: publisher figshare collection journal article supplement (https://geolsoc.figshare.com/articles/dataset/_/3453254)
Supplement: Supplementary file 1 [file 1]

Supplementary Figure S1 (Chen et al.)

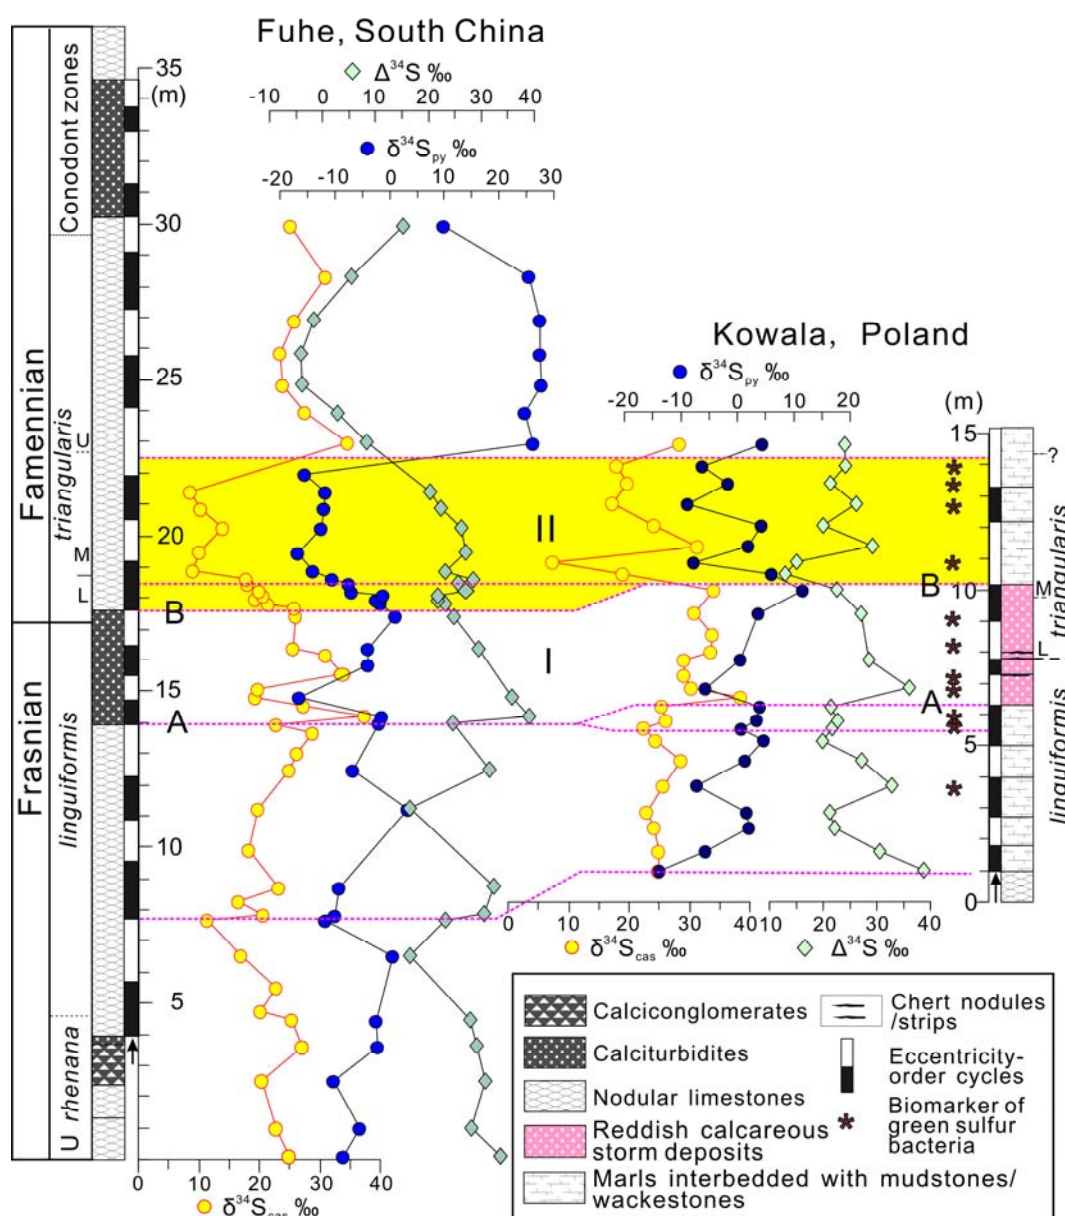

Fig. S1. Systematic variations of  $\delta^{34}\text{S}_{\text{CAS}}$ ,  $\delta^{34}\text{S}_{\text{py}}$  and  $\Delta^{34}\text{S}$  values across the F-F boundary and their correlations between Fuhe, South China and Kowala, Poland. Biomarker data of green sulfur bacteria at Kowala are derived from Joachimski et al. (2002). A and B marks the two major phases of biotic crisis. Some signatures may have been missed below and above interval I at Fuhe and Kowala, respectively, probably due to erosion by calcareous turbidity and storm currents (compared with the signatures within bifurcated horizons).
